# Supplementary material
Source: Springer Nature journal article supplement (https://www.springermedizin.de/resource/supplementary/12889_2006_602_MOESM8_ESM.pdf/9501264)
Supplement: MOESM8 [file 9501264]

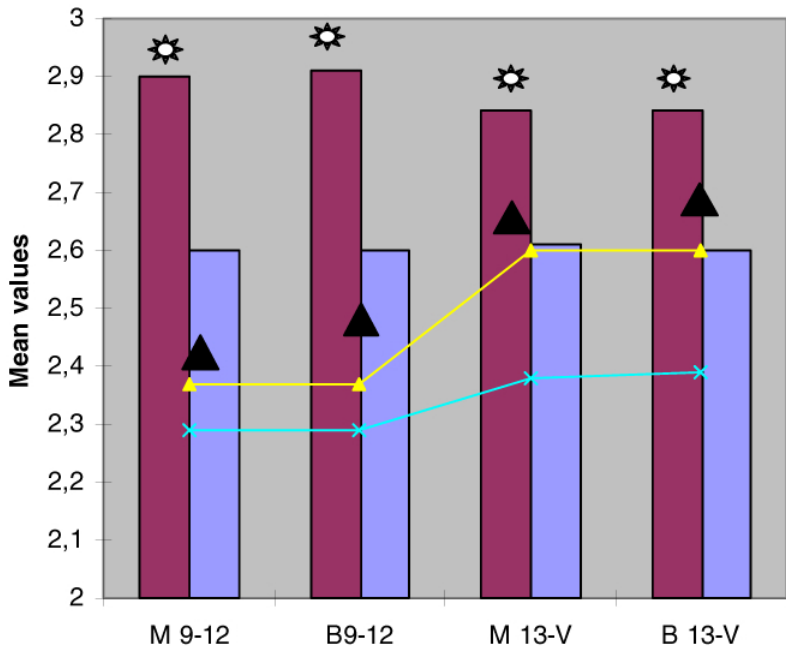

■ N ■ G ▲ S ✕ P

N - Indices for the opinion about one's social identity

G - Indices for possibilities in life

S - Indices for independence

P - Indices for support from other members of the society

M 9-12 - Age and sex groups girls

B 9-12 - Age and sex groups boys

M 13-V - Age and sex groups girls

B 13-V - Age and sex groups boys

▲ -  $p < 0.001$

☀ -  $p < 0.001$
